# Supplementary material
Source: PubMed Central journal article supplement (PMC6319330)

YMTHE, Volume 27

## **Supplemental Information**

**A Potent Tumor-Reactive p53-Specific**

**Single-Chain TCR without On- or Off-Target**

**Autoimmunity *In Vivo***

**Hakim Echchannaoui, Jutta Petschenka, Edite Antunes Ferreira, Beate Hauptrock, Carina Lotz-Jenne, Ralf-Holger Voss, and Matthias Theobald**

## **Supplemental Information**

### **Figure Titles**

- Supplementary Figure 1. Specificity and Functional Avidity of scTCR-Modified Murine T Cells
- Supplementary Figure 2. Histological Analysis of GvHD in Mice Infused with TCR-Modified T Cells
- Supplementary Figure 3. Evaluation of On-Target Reactivity of scTCR-Modified Murine T Cells
- Supplementary Figure 4. Analysis of the Memory State of T Cells in Mice which have Mounted a Complete Tumor Response
- Supplementary Figure 5. Specificity and Functional Avidity of scTCR-Modified Human T Cells

## Figure Legends

**Supplementary Figure 1. Specificity and Functional Avidity of scTCR-Modified Murine T Cells.** TCR-transduced T cells were incubated overnight with T2 cells loaded with the cognate peptide (p53<sub>264-272</sub>) or irrelevant peptide (gp100<sub>280-288</sub>) and stained for intracellular granzyme B (GzmB) (A) and TNF $\alpha$  (B). Representative histograms of p53TCR dc-(black bars) and p53TCR sc-(white bars) modified CD8<sup>+</sup> and CD4<sup>+</sup> T cells are shown. (C) The same TCR-transduced T cells were tested for their cytolytic activities in a 5h <sup>51</sup>Cr-release assay against T2 cells pulsed with the indicated concentrations of p53<sub>264-272</sub> peptide and effector to target ratio (E:T). The avidity of TCR-transduced CD8<sup>+</sup> (left panel) and CD4<sup>+</sup> (right panel) T cells was determined as the concentration needed to induce a half-maximum specific lysis (EC50). (D) Cytolytic activity of TCR-transduced T cells in response to T2 cells pulsed with 10 $\mu$ M of p53<sub>264-272</sub> or irrelevant FluM1<sub>58-66</sub> peptide at the indicated CD8<sup>+</sup>V $\beta$ 3<sup>+</sup> or CD4<sup>+</sup>V $\beta$ 3<sup>+</sup> to target ratios.

**Supplementary Figure 2. Histological Analysis of GvHD in Mice Infused with TCR-Modified T Cells.** Spleens were harvested from mice showing early onset of GvHD symptoms after ACT and processed for histological examination. Tissue sections from mice injected with mock, dc,  $\beta$ c, ac and scTCR-modified T cells (a, b, c, d and e, respectively). Micrographs show frozen sections immunohistochemically stained with anti-CD4 mAb. Very few infiltrating CD4<sup>+</sup> T cells (brown spots) were detected in controls and scTCR-treated animals as opposed to high number of T cell infiltrates in tissues of mice with GvHD, in particular recipients adoptively transferred with dc and  $\beta$ cTCR-T cells. Sections are shown at an original magnification of  $\times$ 20. Scale bar = 50  $\mu$ m.

**Supplementary Figure 3. Evaluation of On-Target Reactivity of scTCR-Modified Murine T Cells.** TCR-transduced T cells were tested for their cytolytic activity in a standard 5h <sup>51</sup>Cr-release assay against (A) p53<sup>+</sup>A2K<sup>b+</sup> mouse (MEF/R172H and MEF/R270H) and p53<sup>+</sup>A2<sup>+</sup> human (Saos2/143) tumor cell lines, p53<sup>-</sup>A2<sup>+</sup> control targets (MEF and Saos2), and (B) MEFs and T cells from HupkiA2 or p53-null A2K<sup>b</sup> mice, pulsed or not with 1 $\mu$ M of p53<sub>264-272</sub> at the indicated CD8<sup>+</sup>V $\beta$ 3<sup>+</sup> to target ratios.

**Supplementary Figure 4. Analysis of the Memory State of T Cells in Mice which have Mounted a Complete Tumor Response.** Spleens from mock control or mice which have

shown complete tumor eradication after transfer of p53 scTCR-modified T cells were harvested, pooled, homogenized, filtered and separated by MACS for CD8<sup>+</sup> T cell population. The antigen memory state of ex-vivo CD8<sup>+</sup> T cells was analyzed by an IFN $\gamma$  ELISPOT assay. Briefly, titrated numbers of MACS-purified CD8<sup>+</sup> T cells (from mock control or p53 scTCR-treated mice) were incubated with T2 cells loaded with p53<sub>264-272</sub> peptide ( $2.5 \times 10^{-7}$ M). A murine T cell line stably expressing the p53 scTCR was used as positive control effector cells. **(A)** Antigen specific IFN $\gamma$ -producing T cells were detected in p53 scTCR-treated mice as opposed to background spots in mock control animals. **(B)** Spot quantification using C.T.L. ImmunoSpot S5 Versa Analyzers (C.T.L. Europe GmbH, Bonn, Germany).

**Supplementary Figure 5. Specificity and Functional Avidity of scTCR-Modified Human T Cells.** **(A)** Avidity ( $K_D$ ) of peptide-MHC pentamer binding to T cells determined by Scatchard analysis. ScTCR-transduced human CD8<sup>+</sup> (open squares, left plot) and CD4<sup>+</sup> (closed squares, right plot) T cells were tested for binding to pentameric p53(264-272)A2.1 complexes by flow cytometry. **(B)** scTCR-transduced human CD8<sup>+</sup> T cells were tested for their cytolytic activities in a 5h <sup>51</sup>Cr-release assay against p53<sup>+</sup>A2.1<sup>+</sup> (Saos2/143) and p53<sup>-</sup>A2.1<sup>+</sup> (Saos2) human tumor cell lines at the indicated CD8<sup>+</sup>V $\beta$ 3<sup>+</sup> to target ratio.



# Supplemental Figure 1

**A**

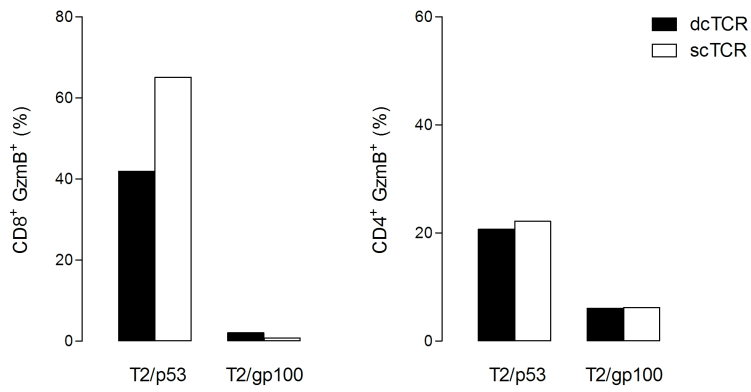

**B**

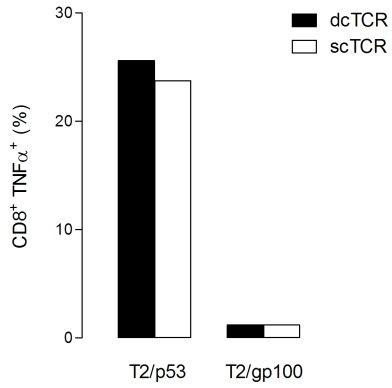

**C**

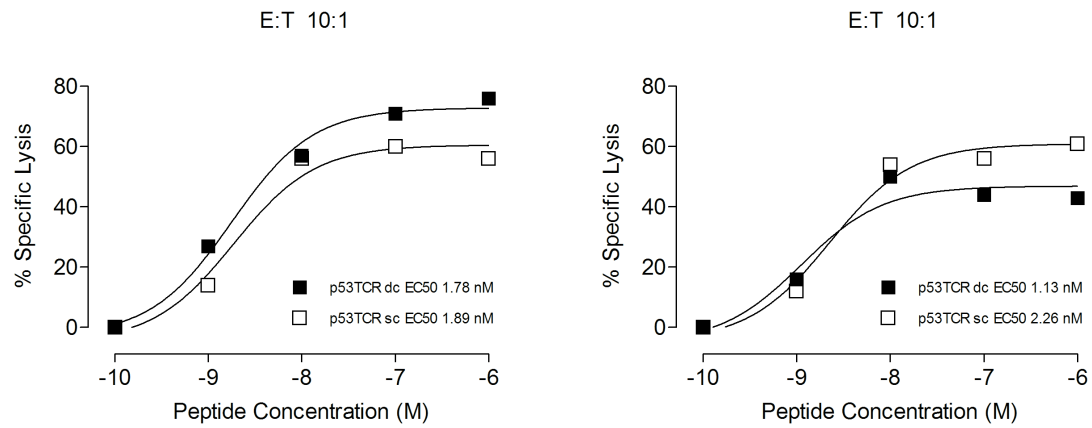

**D**

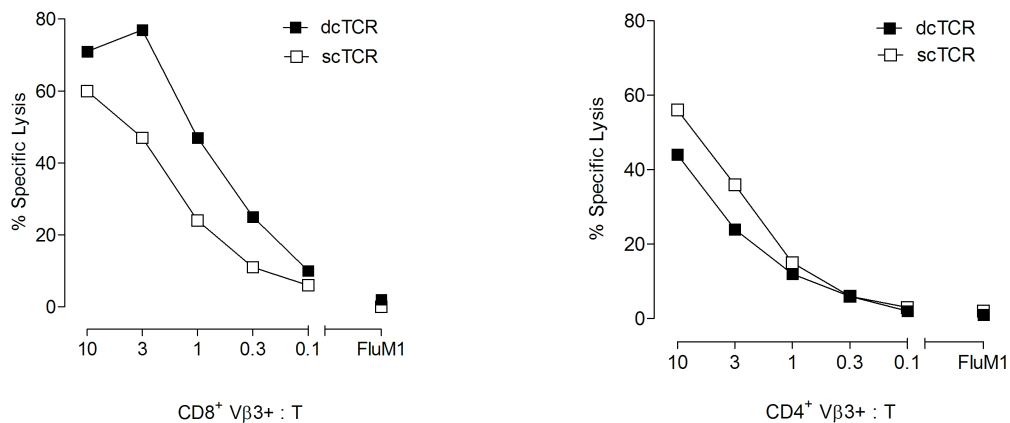

## Supplemental Figure 2

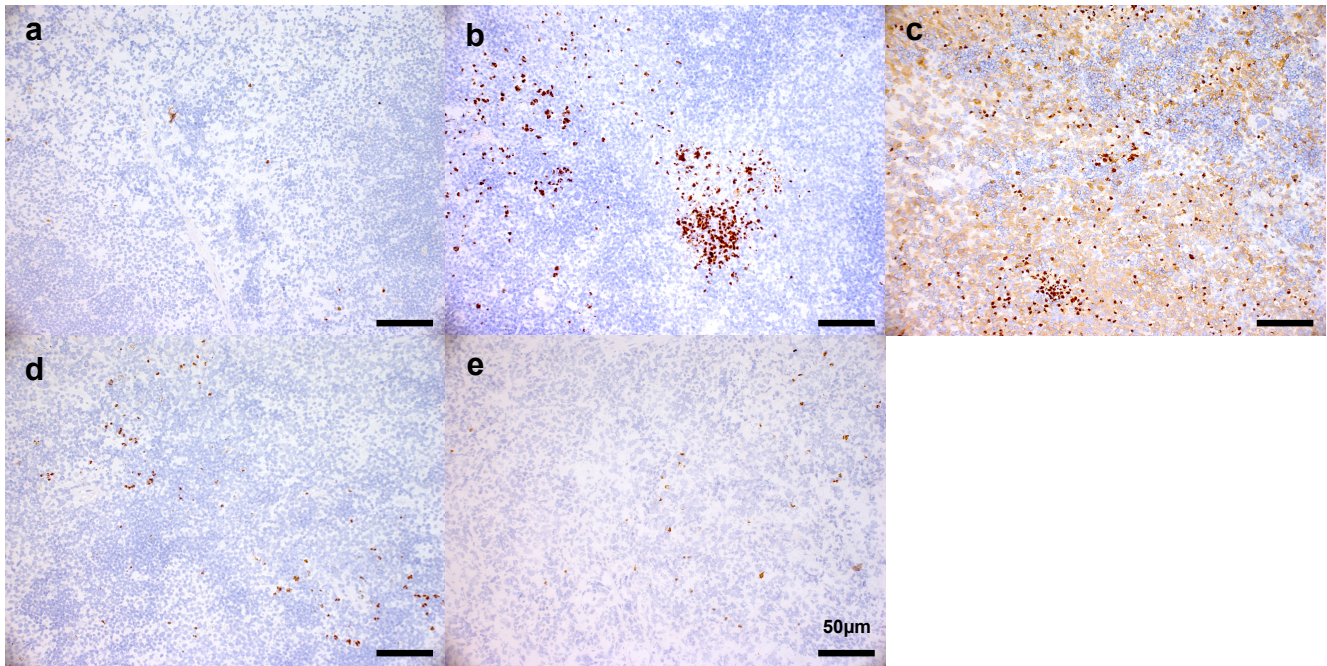

# Supplemental Figure 3

**A**

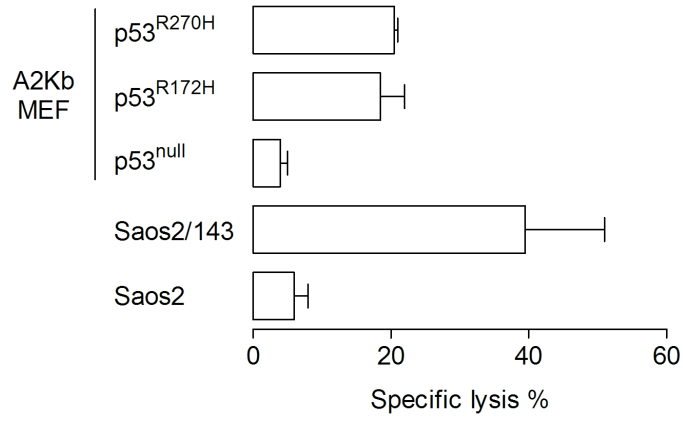

**B**

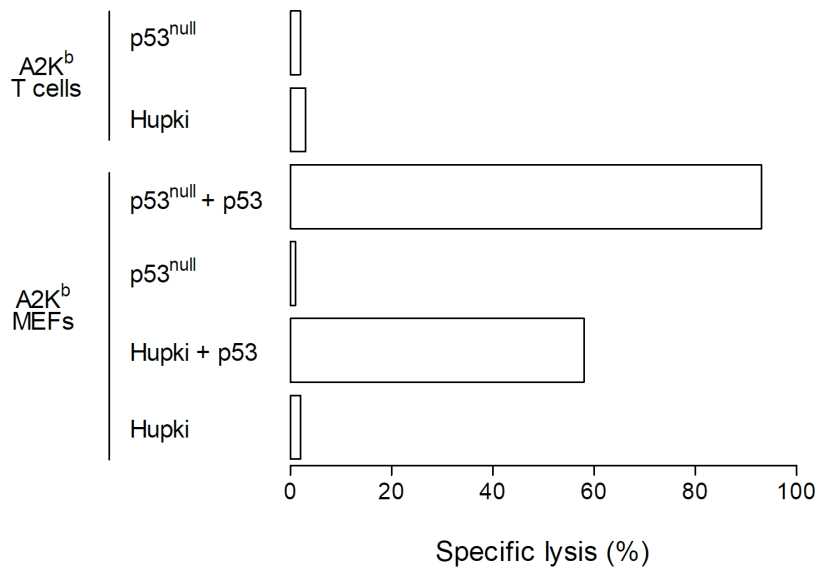

# Supplemental Figure 4

**A**

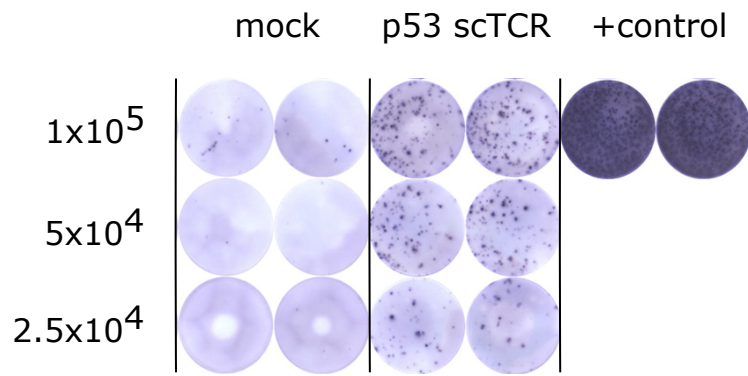

**B**

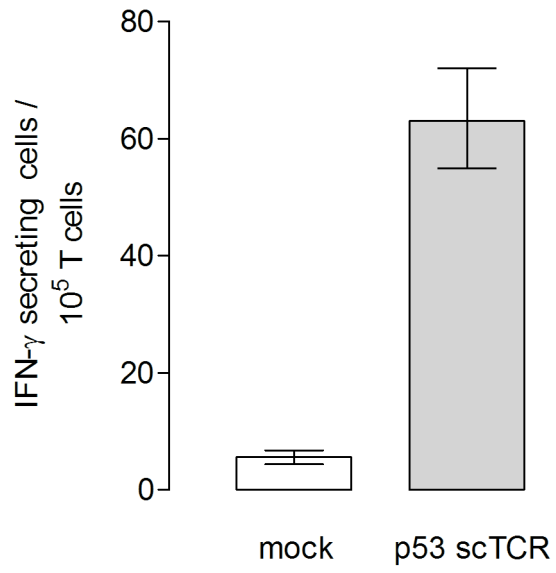

# Supplemental Figure 5

**A**

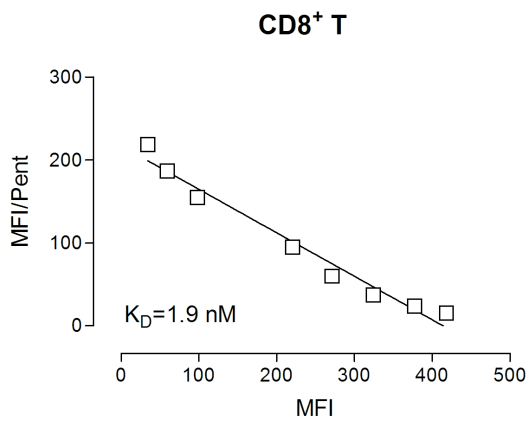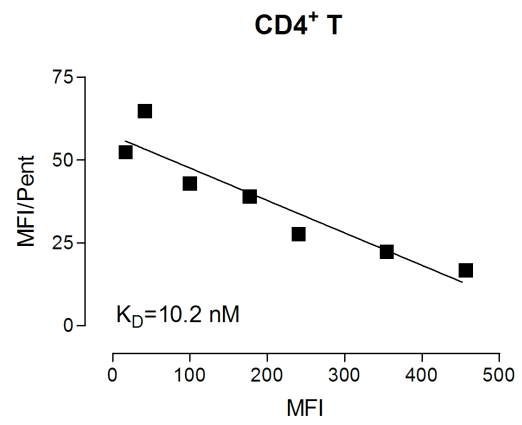

**B**

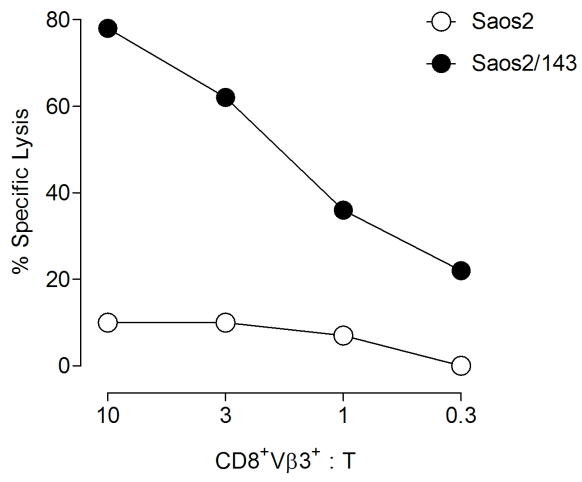

Supplement: mmc1.pdf [file mmc1.pdf]
